# Supplementary material for: Assessing the construct validity and responsiveness of Preference-Based Measures (PBMs) in cataract surgery patients
Source: Qual Life Res. 2020 Feb 20;29(7):1935–46. doi: 10.1007/s11136-020-02443-3 (PMC7295830; doi:10.1007/s11136-020-02443-3)
Supplement: Supplementary file 1 — Supplementary file1 (PDF 73 kb) [file 11136_2020_2443_MOESM1_ESM.pdf]

K Breheny, W Hollingworth, R Kandiyali, P Dixon, A Loose, P Craggs, J Sparrow. Assessing the construct validity and responsiveness of Preference Based Measures (PBMs) in cataract surgery patients. Quality of Life Research.

Corresponding author: Katie Breheny, University of Bristol. [katie.breheny@bristol.ac.uk](mailto:katie.breheny@bristol.ac.uk)

Supplementary material

*PBM and HRQL Questionnaire Scoring and Development*

| <b>PBM</b>           | <b>Construct measured</b> | <b>Target population</b> | <b>Description</b>                                                                                                                                                               | <b>Scoring</b> | <b>Used in economic evaluation</b> | <b>Use in cataracts patients</b> | <b>Minimum possible score</b> | <b>Maximum possible score</b> | <b>Recall period</b> | <b>Valuation method</b> |
|----------------------|---------------------------|--------------------------|----------------------------------------------------------------------------------------------------------------------------------------------------------------------------------|----------------|------------------------------------|----------------------------------|-------------------------------|-------------------------------|----------------------|-------------------------|
| EQ-5D-3L<br>(4)      | HRQL                      | Generic                  | Five-dimension PBM measuring health status. Questions have 3 response options and address domains of usual activities, mobility, anxiety/depression, self-care, pain/discomfort. | PBM            | Yes                                | Yes                              | -0.594                        | 1                             | Today                | TTO                     |
| EQ-5D-3L+VIS<br>(12) | HRQL                      | Visual problems          | Six-dimension PBM measuring health status and visual difficulties. Developed in response to criticism that the EQ-5D was insensitive to visual                                   | PBM            | No                                 | Yes<br>(validation sample)       | 0.284                         | 1                             | Today                | TTO                     |

|                       |                         |                             |                                                                                                                                                                                                  |                 |     |     |                               |      |                  |                                     |
|-----------------------|-------------------------|-----------------------------|--------------------------------------------------------------------------------------------------------------------------------------------------------------------------------------------------|-----------------|-----|-----|-------------------------------|------|------------------|-------------------------------------|
|                       |                         |                             | problems. It comprises the EQ-5D-3L, and an additional vision-specific question.                                                                                                                 |                 |     |     |                               |      |                  |                                     |
| EQ-5D-5L<br>CW (9)    | HRQL                    | Generic                     | Updated version of the EQ-5D-3L. Response options were increased from 3 to 5. Two scoring algorithms are available. 1. A Value Set for England 2. EQ-5D-3L crosswalk.                            | PBM             | Yes | Yes | -0.594<br>CW<br>-0.285<br>VSE | 1    | Today            | TTO (CW)<br>TTO and<br>DCE<br>(VSE) |
| ICECAP-O<br>(17)      | Capability<br>wellbeing | Older<br>people<br>aged 65+ | A PBM for use in older adults, measuring broader wellbeing beyond health. It has five attributes cover attachment, security, role, enjoyment and control. Each attribute has 4 response options. | PBM             | Yes | No  | 0                             | 1    | At the<br>moment | BWS                                 |
| Cat-<br>PROM5<br>(22) | Visual<br>difficulties  | Cataracts                   | A five item, Rasch-scored cataract-specific patient                                                                                                                                              | Rasch<br>scored | No  | Yes | -9.18                         | 7.45 | One<br>month     | N/A                                 |

---

reported outcome  
designed to measure  
visual difficulty from  
cataracts and relief  
from surgery.  
Response options  
range from 4 to 7.

---

PBM – Preference based measure

TTO – Time trade off

DCE- Discrete choice experiment

BWS – Best-worst scaling

CW – EQ-5D-5L Crosswalk scoring algorithm

VSE – EQ-5D-5L Value set for England scoring algorithm
